# Supplementary material for: In situ sulfur loading in graphene-like nano-cell by template-free method for Li–S batteries
Source: Royal Society of Chemistry journal article supplement (doi:10.1039/c7nr07500f), 2018-01-01
Supplement: c7nr07500f1.pdf [file c7nr07500f1.pdf]

## **In-situ sulfur loading in graphene-like nano-cell by template-free method for Li-S batteries**

Huiwei Du<sup>1</sup>, Xuchun Gui<sup>1,\*</sup>, Rongliang Yang<sup>1</sup>, Zhiqiang Lin<sup>1</sup>, Binghao Liang<sup>1</sup>, Wenjun Chen<sup>1</sup>,  
Yongjia Zheng<sup>1</sup>, Hai Zhu<sup>2</sup>, Jun Chen<sup>1,3</sup>

*<sup>1</sup>State Key Lab of Optoelectronic Materials and Technologies, School of Electronics and Information  
Technology, Sun Yat-sen University, Guangzhou, 510275, P. R. China*

*<sup>2</sup>State Key Laboratory of Optoelectronic Materials and Technologies, School of Physics, Sun Yat-Sen  
University, Guangzhou 510275, China*

*<sup>3</sup>Guangdong Province Key Laboratory of Display Material and Technology, School of Electronics  
and Information Technology, Sun Yat-sen University, Guangzhou 510275, P. R. China*

\*To whom correspondence should be addressed. E-mail: [guixch@mail.sysu.edu.cn](mailto:guixch@mail.sysu.edu.cn)

Supporting Information

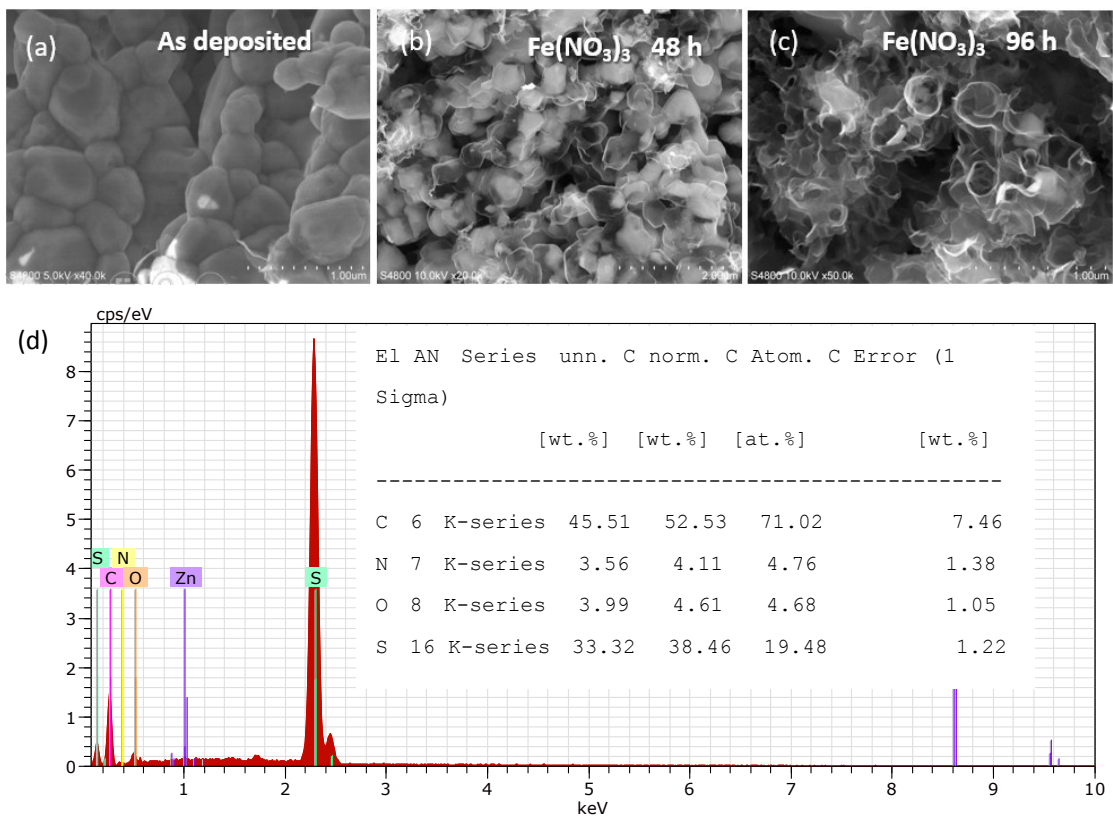

**Fig. S1** SEM images of composites from GLC@ZnS to S@GLC by oxidation of Fe(NO<sub>3</sub>)<sub>3</sub> solutions (a) as deposited, (b) after 48 h, (c) after 96 h. (d) EDS of S@GLC composite after 96 h. The results showed that Zn was completely cleared away and S was remained after 96 h.

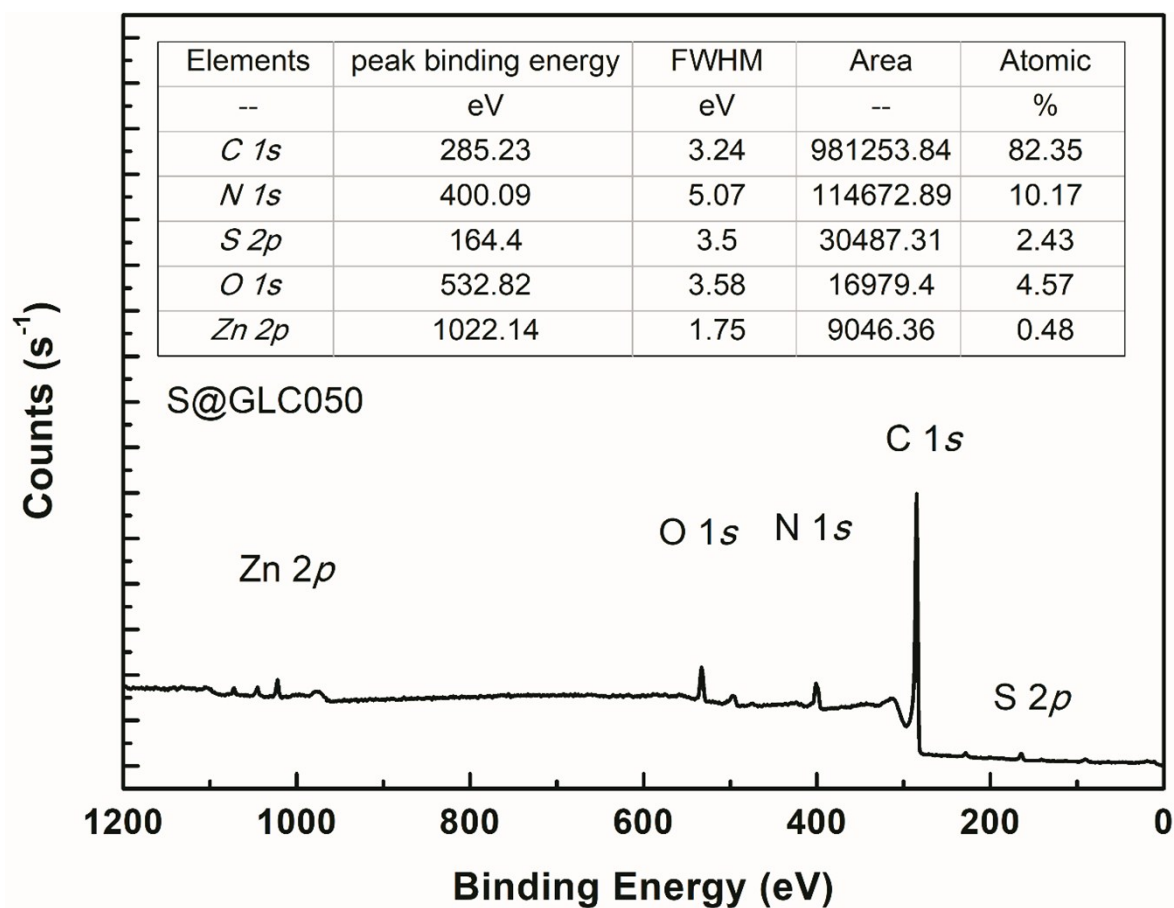

**Fig. S2** The full XPS spectra of S@GLC050

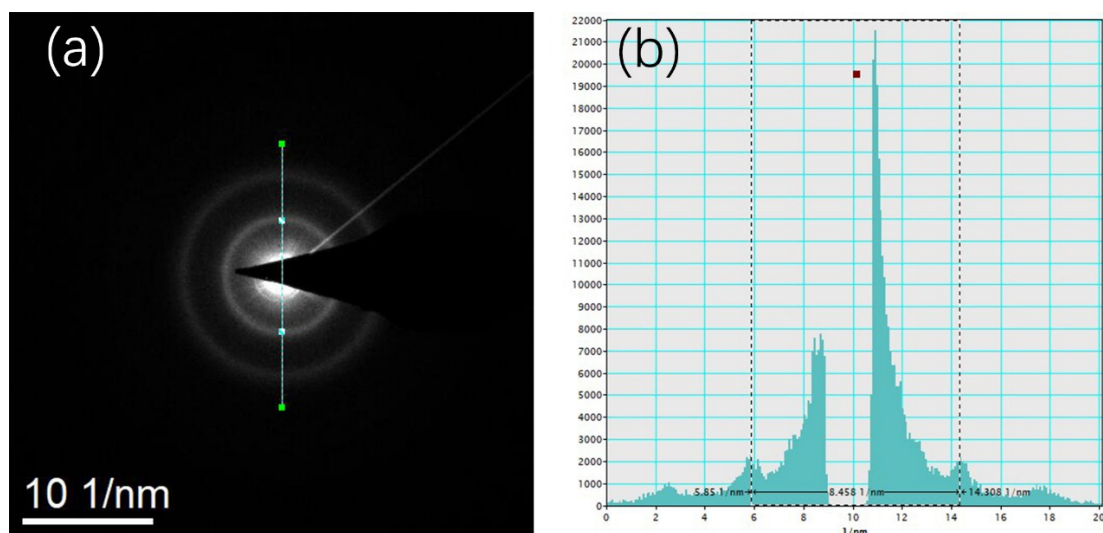

**Fig. S3** (a) SAED patterns and diameter of ring of carbon materials. The SAED pattern of carbon materials in which sulfur was eliminated by thermal treatment (at 300 °C for 30min) is bright concentric rings, indicating the polycrystalline structure. By measuring the radius of diffraction ring, the lattice constant is about 0.236 nm.

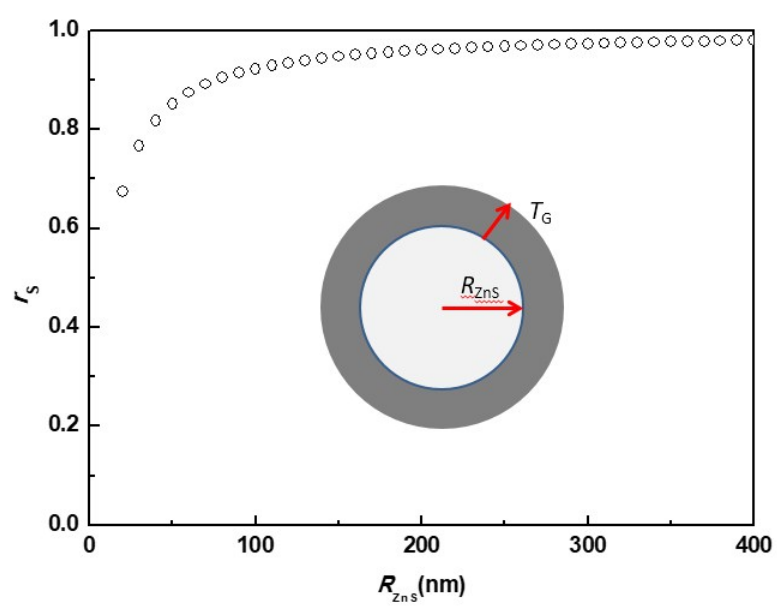

**Fig. S4** Theoretical estimate of sulfur content in S@GLC by *in-situ* sulfur loading based on the size of ZnS nanoparticles

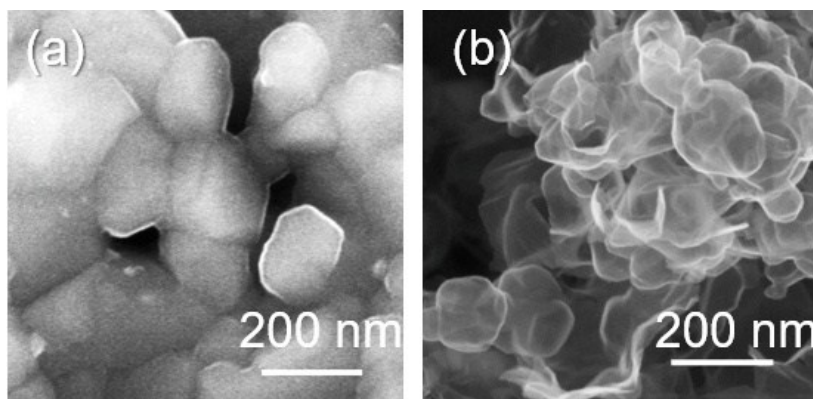

**Fig. S5** SEM image of (a) GLC@ZnS nanoparticles with size of 150 nm, (b) S@GLC150 composite.

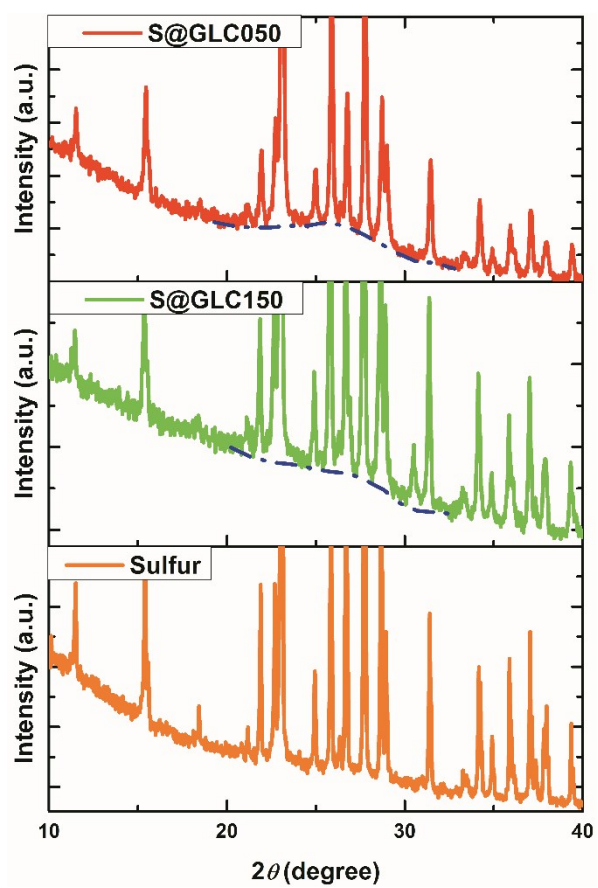

**Fig. S6** XRD patterns of In-situ S@GLC and sulfur.

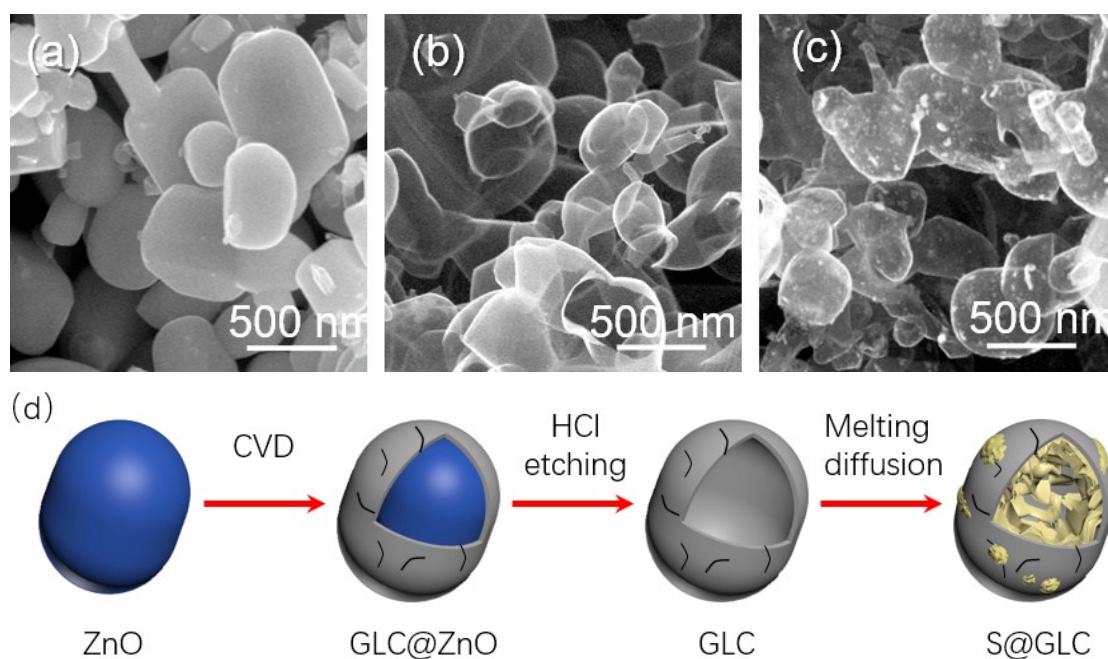

**Fig. S7** SEM image of (a) GLC-wrapped ZnO nanoparticles (GLC@ZnO), (b) GLC after HCl etching, (c) S@GLC by melting-diffusion sulfur loading method. (d) Schematic illustration of synthetic process for S@GLC composite by melting-diffusion sulfur loading.

**Synthesis of S@GLC by melting-diffusion sulfur loading method:** 3.0 g of ZnO nanoparticles were transferred in a quartz tube and heat treated at a rate of  $15\text{ }^{\circ}\text{C min}^{-1}$  under Ar ambient. When the temperature reached  $760\text{ }^{\circ}\text{C}$ , 200 sccm of  $\text{H}_2$  was led into tube. And then 2.4 mL pyridine was led into tube at rate of  $0.08\text{ mL min}^{-1}$ . After depositing and cooling down to room temperature, dark grey GLC@ZnO composite were obtained. The obtained black composite was etching by HCl solution for 24 h. GLC was collected by filtration and washed by deionized water several times. The water in the wet composite was finally removed *via* freeze-drying. The dry powders of GLC was mixed with sulfur at ration of GLC:S= 20:80 and 23:77, respectively. The mixtures were sealed in a glass vessel under argon protection, and heated at  $150\text{ }^{\circ}\text{C}$  for 12 h and followed  $300\text{ }^{\circ}\text{C}$  for 4 h in a quartz tube furnace.

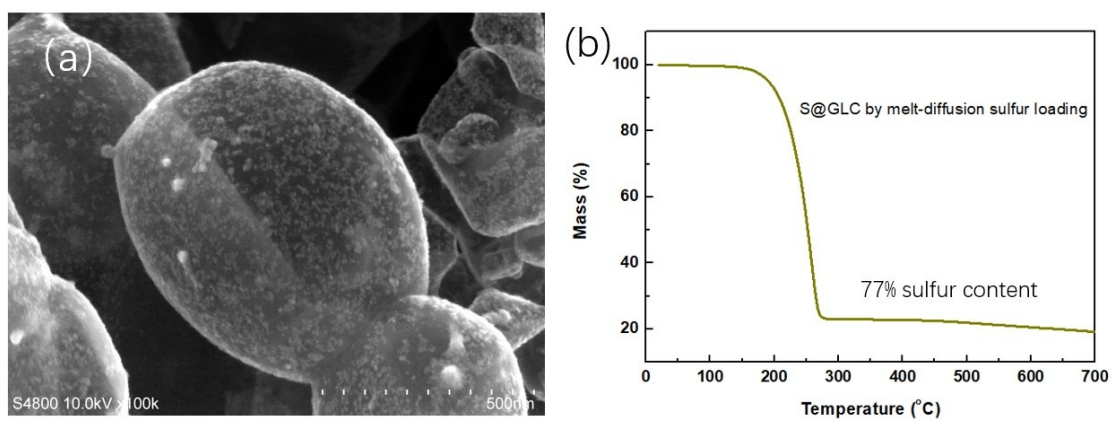

**Fig. S8** (a) Amplified SEM image and (b) TGA curve of S@GLC by melting-diffusion sulfur loading.

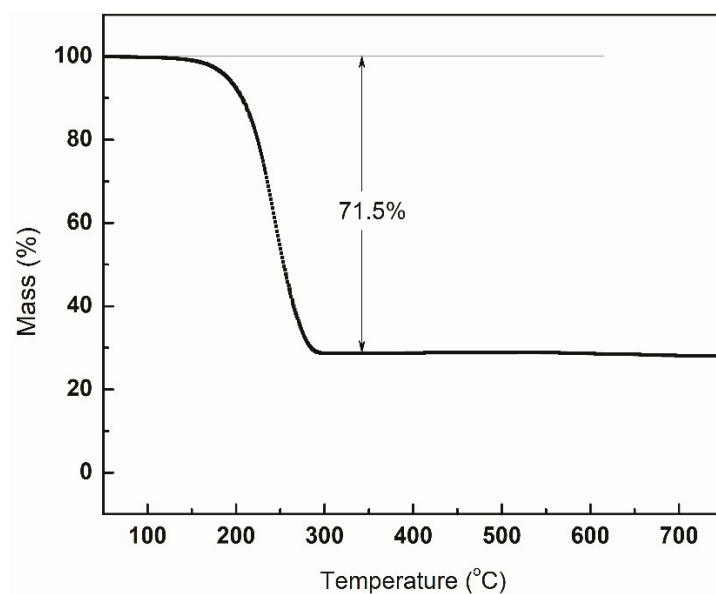

**Fig. S9** TGA curve of S@GLC by mixing S and GLC at weight ratio of sulfur : GLC = 23 : 77 and treated in melting-diffusion process.

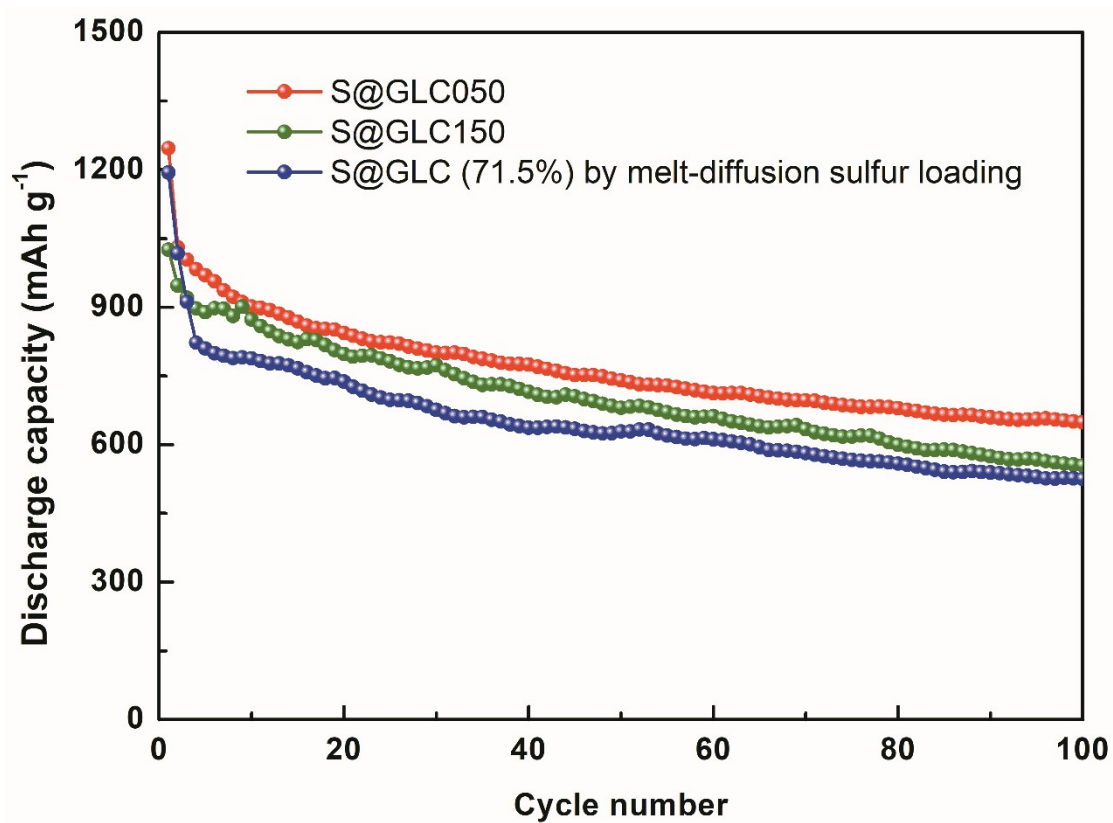

**Fig. S10** Cycling performance of in-situ S@GLC050, in-situ S@GLC150 and S@GLC by melting-diffusion sulfur loading composites as cathode over 100 cycles at charge/discharge rate of 0.2 C

**Table S1** Cell performance based on Graphene-sulfur composite cathodes

| Cathode material          | Synthesis method                                              | Initial capacity (mA h g <sup>-1</sup> ) | Retention (mA h g <sup>-1</sup> ) | Cycle number | Rate                  | Sulfur content |
|---------------------------|---------------------------------------------------------------|------------------------------------------|-----------------------------------|--------------|-----------------------|----------------|
| Go/S <sup>1</sup>         | MD                                                            |                                          | 954                               | 50           | 0.1 C                 | 46.2 wt. %     |
| rGo/S <sup>2</sup>        | MD                                                            | 927                                      | 685                               | 100          | 1 C                   | 67 wt. %       |
| G/S <sup>3</sup>          | MD                                                            | 1210                                     | 958                               | 50           | 0.17 C                | 60 wt. %       |
| G/S <sup>4</sup>          | MD                                                            | 1068                                     | 450                               | 80           | 0.1 C                 | 66 wt. %       |
| G/S                       | S <sub>2</sub> O <sub>3</sub> <sup>2-</sup> + H <sup>+</sup>  | 900                                      | 615                               | 100          | 0.1 C                 | 73 wt. %       |
| N-G/S <sup>5</sup>        | S <sup>2-</sup> + S <sub>2</sub> O <sub>3</sub> <sup>2-</sup> | 1167                                     | 978                               | 150          | 0.2 C                 | 65 wt. %       |
| N-G/S <sup>6</sup>        | S <sub>2</sub> O <sub>3</sub> <sup>2-</sup> + H <sup>+</sup>  | 1356                                     | 847                               | 100          | 0.1 C                 | 80 wt. %       |
|                           |                                                               |                                          | 578                               | 500          | 1 C                   | 80 wt. %       |
| rGo/S <sup>7</sup>        | Sonicate                                                      | 1317                                     | 1125                              | 200          | 0.3 A g <sup>-1</sup> | 63 wt. %       |
| N-G/S <sup>8</sup>        | MD                                                            | 1150                                     | 880                               | 100          | 0.3 A g <sup>-1</sup> | 68.6 wt. %     |
| N-G/S <sup>9</sup>        | MD                                                            | 1138                                     | 821                               | 100          | 0.3 A g <sup>-1</sup> | 52 wt. %       |
| N/P-G/CNT/S <sup>10</sup> | MD                                                            | 1446                                     | 912                               | 100          | 0.1 C                 | 56.7 wt. %     |
|                           |                                                               | 921                                      | 795                               | 400          | 1 C                   | 56.7 wt. %     |
| G/S <sup>11</sup>         | MD                                                            | 1430                                     | 700                               | 300          | 1 C                   | 78.9 wt. %     |
| <b>This work</b>          |                                                               | 1253                                     | 648                               | 100          | 0.2 C                 | 77 wt. %       |
|                           |                                                               | 850                                      | 502                               | 400          | 1 C                   | 77 wt. %       |

Go: graphene oxide; rGo: reduced graphene oxide; N-G: nitrogen-doped graphene

N/P-G: N/P co-doped graphene; CNT: carbon nanotube; MD: melting-diffusion sulfur loading

1. L. Ji, M. Rao, H. Zheng, L. Zhang, Y. Li, W. Duan, J. Guo, E. J. Cairns and Y. Zhang, *Journal of the American Chemical Society*, 2011, **133**, 18522-18525.
2. B. Ding, C. Yuan, L. Shen, G. Xu, P. Nie, Q. Lai and X. Zhang, *J. Mater. Chem. A*, 2013, **1**, 1096-1101.
3. Y.-X. Wang, L. Huang, L.-C. Sun, S.-Y. Xie, G.-L. Xu, S.-R. Chen, Y.-F. Xu, J.-T. Li, S.-L. Chou, S.-X. Dou and S.-G. Sun, *Journal of Materials Chemistry*, 2012, **22**, 4744.
4. J.Q. Huang, X.F. Liu, Q. Zhang, C.-M. Chen, M.Q. Zhao, S.M. Zhang, W. Zhu, W.Z. Qian and F. Wei, *Nano Energy*, 2013, **2**, 314-321.
5. Y. Qiu, W. Li, W. Zhao, G. Li, Y. Hou, M. Liu, L. Zhou, F. Ye, H. Li, Z. Wei, S. Yang, W. Duan, Y. Ye, J. Guo and Y. Zhang, *Nano letters*, 2014, **14**, 4821-4827.
6. X. Wang, Z. Zhang, Y. Qu, Y. Lai and J. Li, *Journal of Power Sources*, 2014, **256**, 361-368.
7. C. Wang, X. Wang, Y. Wang, J. Chen, H. Zhou and Y. Huang, *Nano Energy*, 2015, **11**, 678-686.
8. L. Li, G. Zhou, L. Yin, N. Koratkar, F. Li and H. M. Cheng, *Carbon*, 2016, **108**, 120-126.
9. Y. Dong, R.-T. He and L.-Z. Fan, *Ionics*, 2017, **23**, 3329-3337.
10. H. Wu, L. Xia, J. Ren, Q. Zheng, C. Xu and D. Lin, *J. Mater. Chem. A*, 2017, **5**, 20458-20472.
11. Z. Zheng, H. Guo, F. Pei, X. Zhang, X. Chen, X. Fang, T. Wang and N. Zheng, *Advanced Functional Materials*, 2016, **26**, 8952-8959.
